# Supplementary material
Source: ML conference proceedings conference paper supplement (https://openaccess.thecvf.com/content/CVPR2022/html/Yang_ImplicitAtlas_Learning_Deformable_CVPR_2022_paper.html)
Supplement: Supplementary file 2 [file Yang_ImplicitAtlas_Learning_Deformable_CVPR_2022_supplemental.zip]

Archive with 4 entries (4 files):
- appendix.pdf
- __MACOSX/._appendix.pdf
- supplementary_visualization.zip
- __MACOSX/._supplementary_visualization.zip
